# Supplementary material
Source: ML conference proceedings conference paper supplement (https://proceedings.neurips.cc/paper_files/paper/2013/hash/076a0c97d09cf1a0ec3e19c7f2529f2b-Abstract.html)
Supplement: Supplementary file [file 076a0c97d09cf1a0ec3e19c7f2529f2b-Supplemental.zip]

## Appendix to “A Kernel Test for Three-Variable Interactions”, *NIPS 2013*

Dino Sejdinovic, Arthur Gretton, Wicher Bergsma

### A Proofs

#### A.1 Proof of Proposition 2

Some basic matrix algebra used in this proof is reviewed in Appendix F. The proof of the following simple Lemma directly follows from the results therein.

**Lemma 6.** *The following equalities hold:*

1.  $(K_+ \circ L_+ \circ M)_{++} = (K_+^\top \circ L_+^\top \circ M)_{++} = \text{tr}(K_+ \circ L_+ \circ M_+) = \sum_{a=1}^n K_{a+} L_{a+} M_{a+}$
2.  $(K_+ \circ L \circ M_+^\top)_{++} = (KLM)_{++}$

Now, we will take a kernel matrix  $M$  and consider its Hadamard product with  $\tilde{K} \circ \tilde{L}$ :

$$\begin{aligned}
 \tilde{K} \circ \tilde{L} \circ M &= K \circ L \circ M - \frac{1}{n} \left[ \underbrace{K \circ L_+ \circ M}_A + \underbrace{K \circ L_+^\top \circ M}_{A^\top} + \underbrace{K_+ \circ L \circ M}_B + \underbrace{K_+^\top \circ L \circ M}_{B^\top} \right] \\
 &+ \frac{1}{n^2} (K_{++} L \circ M + L_{++} K \circ M) \\
 &+ \frac{1}{n^2} \left[ \underbrace{K_+ \circ L_+ \circ M}_C + \underbrace{K_+^\top \circ L_+^\top \circ M}_{C^\top} + \underbrace{K_+ \circ L_+^\top \circ M}_D + \underbrace{K_+^\top \circ L_+ \circ M}_{D^\top} \right] \\
 &- \frac{1}{n^3} K_{++} [L_+ \circ M + L_+^\top \circ M] - \frac{1}{n^3} L_{++} [K_+ \circ M + K_+^\top \circ M] \\
 &+ \frac{1}{n^4} K_{++} L_{++} M.
 \end{aligned}$$

and thus:

$$\begin{aligned}
 (\tilde{K} \circ \tilde{L} \circ M)_{++} &= (K \circ L \circ M)_{++} - \frac{2}{n} ((K \circ M) L + (L \circ M) K)_{++} \\
 &+ \frac{1}{n^2} [K_{++} (L \circ M)_{++} + L_{++} (K \circ M)_{++}] \\
 &+ \frac{2}{n^2} [\text{tr}(K_+ \circ L_+ \circ M_+) + (LMK)_{++}] \\
 &- \frac{2}{n^3} [K_{++} (LM)_{++} + L_{++} (KM)_{++}] \\
 &+ \frac{1}{n^4} K_{++} L_{++} M_{++}.
 \end{aligned}$$

where we used that  $A_{++} = ((K \circ M) \circ L_+)_{++} = ((K \circ M) L)_{++}$ , and similarly  $B_{++} = ((L \circ M) K)_{++}$ . Also,  $C_{++} = \text{tr}(K_+ \circ L_+ \circ M_+)$  and  $D_{++} = (LMK)_{++}$ .

By comparing to the table of V-statistics, we obtain that:

$$\frac{1}{n^2} (\tilde{K} \circ \tilde{L} \circ M)_{++} = \left\| \Delta_{(Z)} \hat{P} \right\|_{k \otimes l \otimes m}^2$$

where  $\Delta_{(Z)} \hat{P} = \hat{P}_{XYZ} + \hat{P}_X \hat{P}_Y \hat{P}_Z - \hat{P}_{YZ} \hat{P}_X - \hat{P}_{XZ} \hat{P}_Y$ , which completes the proof of Proposition 2. Proposition 3 can be proved in an analogous way by including the additional terms corresponding to centering of  $M$ , i.e.,  $(\tilde{K} \circ \tilde{L} \circ M_+)_{++}$  and  $(\tilde{K} \circ \tilde{L} \circ M_{++})_{++}$ . In the next Section, however, we give an alternative proof which gives more insight into the role that the centering of each Gram matrix plays.

### A.2 Proof of Proposition 3

It will be useful to introduce into notation the kernel centered at a probability measure  $\nu$ , given by:

$$\tilde{k}_\nu(z, z') := k(z, z') + \int \int k(w, w') d\nu(w) d\nu(w') - \int [k(z, w) + k(z', w)] d\nu(w), \quad (6)$$

Note that  $\int \tilde{k}_\nu(z, z') d\nu(z) d\nu(z') = 0$ , i.e.,  $\mu_{\tilde{k}_\nu}(\nu) \equiv 0$ .

By expanding the population expression of the kernel norm of the joint under the kernels centered at the marginals, we obtain:

$$\begin{aligned} \|P_{XYZ}\|_{\tilde{k}_{P_X} \otimes \tilde{l}_{P_Y} \otimes \tilde{m}_{P_Z}}^2 &= \int \int \int [\tilde{k}_{P_X}(x, x') \tilde{l}_{P_Y}(y, y') \tilde{m}_{P_Z}(z, z')] \\ &\quad dP_{XYZ}(x, y, z) dP_{XYZ}(x', y', z'), \end{aligned}$$

Substituting the definition of the centered kernel in (6), it is readily obtained that

$$\|P_{XYZ}\|_{\tilde{k}_{P_X} \otimes \tilde{l}_{P_Y} \otimes \tilde{m}_{P_Z}}^2 = \|\Delta_L P\|_{k \otimes l \otimes m}^2.$$

Now,  $\|P_{XYZ}\|_{\tilde{k}_{P_X} \otimes \tilde{l}_{P_Y} \otimes \tilde{m}_{P_Z}}^2$  is the first term in the expansion of  $\|\Delta_L P\|_{\tilde{k}_{P_X} \otimes \tilde{l}_{P_Y} \otimes \tilde{m}_{P_Z}}^2$ . Let us show that all the other terms are equal to zero. Indeed, all the other terms are of the form

$$\langle \langle P_W Q, Q' \rangle \rangle_{\tilde{k}_{P_X} \otimes \tilde{l}_{P_Y} \otimes \tilde{m}_{P_Z}},$$

where  $W = X, Y$ , or  $Z$  (individual variable). Without loss of generality, let  $W = X$ . Then,

$$\begin{aligned} &\langle \langle P_X Q, Q' \rangle \rangle_{\tilde{k}_{P_X} \otimes \tilde{l}_{P_Y} \otimes \tilde{m}_{P_Z}} \\ &= \int \int \int [\tilde{k}_{P_X}(x, x') \tilde{l}_{P_Y}(y, y') \tilde{m}_{P_Z}(z, z')] \\ &\quad dP_X(x) dQ(y, z) dQ'(x', y', z') \\ &= \int \int \int \underbrace{\tilde{k}_{P_X}(x, x') dP_X(x)}_{= [\mu_{\tilde{k}_{P_X}}(P_X)](x')=0} \tilde{l}_{P_Y}(y, y') \tilde{m}_{P_Z}(z, z') \\ &\quad dQ(y, z) dQ'(x', y', z') \\ &= 0. \end{aligned}$$

Therefore,

$$\begin{aligned} \|\Delta_L P\|_{\tilde{k}_{P_X} \otimes \tilde{l}_{P_Y} \otimes \tilde{m}_{P_Z}}^2 &= \|P_{XYZ}\|_{\tilde{k}_{P_X} \otimes \tilde{l}_{P_Y} \otimes \tilde{m}_{P_Z}}^2 \\ &= \|\Delta_L P\|_{k \otimes l \otimes m}^2. \end{aligned}$$

The above is true for any joint distribution  $P_{XYZ}$ , and in particular for the empirical joint, whereby:

$$\begin{aligned} \|\Delta_L \hat{P}\|_{k \otimes l \otimes m}^2 &= \|\hat{P}_{XYZ}\|_{\tilde{k}_{\hat{P}_X} \otimes \tilde{l}_{\hat{P}_Y} \otimes \tilde{m}_{\hat{P}_Z}}^2 \\ &= \frac{1}{n^2} (\tilde{K} \circ \tilde{L} \circ \tilde{M})_{++}. \end{aligned}$$

### A.3 Proof of Proposition 4

Consider the element of  $\mathcal{H}_k \otimes \mathcal{H}_l \otimes \mathcal{H}_m$  given by  $\mathbb{E}_{XYZ} k(\cdot, X) \otimes l(\cdot, Y) \otimes m(\cdot, Z)$ . This can be identified with a Hilbert-Schmidt uncentered covariance operator  $C_{(XY)Z} : \mathcal{H}_k \otimes \mathcal{H}_l \rightarrow \mathcal{H}_m$ , such that  $\forall f \in \mathcal{H}_k, g \in \mathcal{H}_l, h \in \mathcal{H}_m$ :

$$\langle C_{(XY)Z} [f \otimes g], h \rangle_{\mathcal{H}_m} = \mathbb{E}_{XYZ} f(X) g(Y) h(Z).$$

Table 3: V-statistics for various hypotheses

| hypothesis                  | V-statistic                                      | hypothesis           | V-statistic                                                      |
|-----------------------------|--------------------------------------------------|----------------------|------------------------------------------------------------------|
| $(X, Y) \perp\!\!\!\perp Z$ | $\frac{1}{n^2} (K \circ L \circ \tilde{M})_{++}$ | $\Delta_{(X)} P = 0$ | $\frac{1}{n^2} (K \circ \tilde{L} \circ \tilde{M})_{++}$         |
| $(X, Z) \perp\!\!\!\perp Y$ | $\frac{1}{n^2} (K \circ \tilde{L} \circ M)_{++}$ | $\Delta_{(Y)} P = 0$ | $\frac{1}{n^2} (\tilde{K} \circ L \circ \tilde{M})_{++}$         |
| $(Y, Z) \perp\!\!\!\perp X$ | $\frac{1}{n^2} (\tilde{K} \circ L \circ M)_{++}$ | $\Delta_{(Z)} P = 0$ | $\frac{1}{n^2} (\tilde{K} \circ \tilde{L} \circ M)_{++}$         |
|                             |                                                  | $\Delta_L P = 0$     | $\frac{1}{n^2} (\tilde{K} \circ \tilde{L} \circ \tilde{M})_{++}$ |

By replacing  $k, l, m$  with kernels centered at the marginals, we obtain a centered covariance operator  $\Sigma_{(XY)Z}$ , for which

$$\begin{aligned} \langle \Sigma_{(XY)Z} [f \otimes g], h \rangle_{\mathcal{H}_m} &= \mathbb{E}_{XYZ} \tilde{f}(X) \tilde{g}(Y) \tilde{h}(Z) \\ &= \text{cov}[f(X), g(Y), h(Z)], \end{aligned}$$

where we wrote  $\tilde{f}(X) = f(X) - \mathbb{E}f(X)$ , and similarly for  $\tilde{g}$  and  $\tilde{h}$ . Using the usual isometries between Hilbert-Schmidt spaces and the tensor product spaces:

$$\begin{aligned} &\|\Sigma_{(XY)Z}\|_{HS}^2 \\ &= \left\| \mathbb{E}_{XYZ} \tilde{k}_{P_X}(\cdot, X) \otimes \tilde{l}_{P_Y}(\cdot, Y) \otimes \tilde{m}_{P_Z}(\cdot, Z) \right\|_{\mathcal{H}_k \otimes \mathcal{H}_l \otimes \mathcal{H}_m}^2 \\ &= \|P_{XYZ}\|_{k_{P_X} \otimes l_{P_Y} \otimes m_{P_Z}}^2 \\ &= \|\Delta_L P\|_{k \otimes l \otimes m}^2. \end{aligned}$$

Now, consider the supremum of the three-way covariance taken over the unit balls of respective RKHSs:

$$\begin{aligned} \sup_{f,g,h} \text{cov}[f(X), g(Y), h(Z)] &= \sup_{f,g,h} \langle \Sigma_{(XY)Z} [f \otimes g], h \rangle_{\mathcal{H}_m} \\ &= \sup_{f,g} \|\Sigma_{(XY)Z} [f \otimes g]\|_{\mathcal{H}_m} \\ &\leq \sup_{F \in \mathcal{H}_k \otimes \mathcal{H}_l} \|\Sigma_{(XY)Z} F\|_{\mathcal{H}_m} \\ &= \|\Sigma_{(XY)Z}\|_{op} \leq \|\Sigma_{(XY)Z}\|_{HS}. \end{aligned}$$

and thus,  $\|\Delta_L P\|_{k \otimes l \otimes m} = 0$  implies  $\sup_{f,g,h} \text{cov}[f(X), g(Y), h(Z)] = 0$ . Conversely, if  $\text{cov}[f(X), g(Y), h(Z)] = 0 \forall f, g, h$ , then  $\Sigma_{(XY)Z} [f \otimes g] \equiv 0 \forall f, g$ , so the linear operator  $\Sigma_{(XY)Z}$  vanishes.

## B The effect of centering

In a two-variable test, either or both of the kernel matrices can be centered when computing the test statistic since  $(K \circ \tilde{L})_{++} = (\tilde{K} \circ L)_{++} = (\tilde{K} \circ \tilde{L})_{++}$ . To see this, simply note that by the idempotence of  $H$ ,

$$\begin{aligned} (K \circ \tilde{L})_{++} &= \text{tr}(KHLH) \\ &= \text{tr}(KH^2LH^2) \\ &= \text{tr}(HKKH^2LH) \\ &= (HKKH \circ HLLH)_{++} \\ &= (\tilde{K} \circ \tilde{L})_{++}. \end{aligned} \tag{7}$$

Table 4: An example of Lancaster interaction measure vanishing for the case where neither variable is independent of the other two.

|                    |                    |
|--------------------|--------------------|
| $P(0, 0, 0) = 0.2$ | $P(0, 0, 1) = 0.1$ |
| $P(0, 1, 0) = 0.1$ | $P(0, 1, 1) = 0.1$ |
| $P(1, 0, 0) = 0.1$ | $P(1, 0, 1) = 0.1$ |
| $P(1, 1, 0) = 0.1$ | $P(1, 1, 1) = 0.2$ |

This is no longer true in the three-variable case, where centering of each matrix has a different meaning. Various hypotheses and their corresponding V-statistics are summarized in Table 3. Note that the “composite” hypotheses are obtained simply by an appropriate centering of Gram matrices.

$$\mathbf{C} \quad \Delta_L P = 0 \not\Rightarrow (X, Y) \perp\!\!\!\perp Z \vee (X, Z) \perp\!\!\!\perp Y \vee (Y, Z) \perp\!\!\!\perp X.$$

Consider the following simple example with binary variables  $X, Y, Z$  with the  $2 \times 2 \times 2$  probability table given in Table 4. It is readily checked that all conditional covariances are equal, so  $\Delta_L P = 0$ . It is also clear, however, that neither variable is independent of the other two. Therefore, a test for Lancaster interaction *per se* is not equivalent to testing for the possibility of any factorization of the joint distribution, but our empirical results suggest that it can nonetheless provide a useful surrogate. In other words, while rejection of the null hypothesis  $\Delta_L P = 0$  is highly informative and implies that interaction is present and *no* non-trivial factorization of the joint distribution is available, the acceptance of the null hypothesis should be considered carefully and additional methods to rule out interaction should be sought.

## D Permutation test

A permutation test for total independence is easy to construct: it suffices to compute the value of the statistic (either the Lancaster statistic  $\left\| \Delta_L \hat{P} \right\|_{k \otimes l \otimes m}^2$  or the total independence statistic  $\left\| \Delta_{tot} \hat{P} \right\|_{k \otimes l \otimes m}^2$ ) on  $\{(X^{(i)}, Y^{(\sigma i)}, Z^{(\tau i)})\}_{i=1}^n$ , for randomly drawn independent permutations  $\sigma, \tau \in S_n$  in order to obtain a sample from the null distribution.

When testing for *only one* of the hypotheses  $(Y, Z) \perp\!\!\!\perp X$ ,  $(X, Z) \perp\!\!\!\perp Y$ , or  $(X, Y) \perp\!\!\!\perp Z$ , either with a Lancaster statistic or with a standard two-variable kernel statistic, only one of the samples should be permuted, e.g., if testing for  $(Y, Z) \perp\!\!\!\perp X$ , statistics should be computed on  $\{(X^{(\sigma i)}, Y^{(i)}, Z^{(i)})\}_{i=1}^n$ , for  $\sigma \in S_n$ . However, when testing for the disjunction of these hypotheses, i.e., for the existence of a nontrivial factorization of the joint distribution, we are within a multiple hypothesis testing framework (even though one may deal with a single test statistic, as in the Lancaster case). To ensure that the required confidence level  $\alpha = 0.05$  is reached for the factorization hypothesis, in the experiments reported in Figure 3, the Holm’s sequentially rejective Bonferroni method [35] is used for both the two-variable based and for the Lancaster based factorization tests. Namely,  $p$ -values are computed for each of the hypotheses  $(Y, Z) \perp\!\!\!\perp X$ ,  $(X, Z) \perp\!\!\!\perp Y$ , or  $(X, Y) \perp\!\!\!\perp Z$  using the permutation test, and sorted in the ascending order  $p_{(1)}, p_{(2)}, p_{(3)}$ . Hypotheses are then rejected sequentially if  $p_{(l)} < \frac{\alpha}{4-l}$ . The factorization hypothesis is then rejected if and only if all three hypotheses are rejected.

## E Asymptotic behavior

Using terminology from [26], kernels  $k$  and  $k'$  are said to be equivalent if they induce the same semimetric on the domain, i.e.,  $k(x, x) + k(x', x') - 2k(x, x') = k'(x, x) + k'(x', x') - 2k'(x, x') \forall x, x'$ . It can be shown that the Lancaster statistic is invariant to changing kernels within the kernel equivalence class, i.e., that

$$\left\| \Delta_L \hat{P} \right\|_{k \otimes l \otimes m}^2 = \left\| \Delta_L \hat{P} \right\|_{k' \otimes l' \otimes m'}^2,$$

whenever  $k, k', l, l'$  and  $m, m'$  are equivalent pairs. From here,

$$\left\| \Delta_L \hat{P} \right\|_{k \otimes l \otimes m}^2 = \left\| \Delta_L \hat{P} \right\|_{\tilde{k}_{P_X} \otimes \tilde{l}_{P_Y} \otimes \tilde{m}_{P_Z}}^2.$$

In Section A.2, we were able to show a similar expression but only for changing  $k$  to its version  $\tilde{k}_{\hat{P}_X}$  centered at the *empirical marginal*. Now, under the assumption of total independence, i.e., that  $P_{XYZ} = P_X P_Y P_Z$ , the dominating term in  $\left\| \Delta_L \hat{P} \right\|_{\tilde{k}_{P_X} \otimes \tilde{l}_{P_Y} \otimes \tilde{m}_{P_Z}}^2$  is  $\left\| \hat{P}_{XYZ} \right\|_{\tilde{k}_{P_X} \otimes \tilde{l}_{P_Y} \otimes \tilde{m}_{P_Z}}^2$ . By standard arguments, under total independence, this converges in distribution to a sum of independent chi-squared variables,

$$n \left\| \hat{P}_{XYZ} \right\|_{\tilde{k}_{P_X} \otimes \tilde{l}_{P_Y} \otimes \tilde{m}_{P_Z}}^2 \rightsquigarrow \sum_{a=1}^{\infty} \sum_{b=1}^{\infty} \sum_{c=1}^{\infty} \lambda_a \eta_b \theta_c N_{abc}^2, \quad (8)$$

where  $\{\lambda_a\}$ ,  $\{\eta_b\}$ ,  $\{\theta_c\}$  are, respectively, eigenvalues of integral operators associated to  $\tilde{k}_{P_X}$ ,  $\tilde{l}_{P_Y}$  and  $\tilde{m}_{P_Z}$ , and  $N_{abc} \stackrel{i.i.d.}{\sim} \mathcal{N}(0, 1)$ . Other terms in  $\left\| \Delta_L \hat{P} \right\|_{\tilde{k}_{P_X} \otimes \tilde{l}_{P_Y} \otimes \tilde{m}_{P_Z}}^2$  can be shown to drop to zero at a faster rate, as in the two-variable case. The resulting distribution of such a sum of chi-squares can, in principle, be estimated using a Monte Carlo method, by computing a number of eigenvalues of  $\tilde{K}$ ,  $\tilde{L}$  and  $\tilde{M}$ , as in [36, 18]. This is of little practical value though, as it is in most cases simpler and faster to run a permutation test, as we describe in Appendix D. On the other hand, the above result quantifies the highest order of bias of the V-statistic under total independence to be equal to  $\frac{1}{n} \sum_{a=1}^{\infty} \lambda_a \sum_{b=1}^{\infty} \eta_b \sum_{c=1}^{\infty} \theta_c$ , which can be estimated as  $\frac{1}{n^3} \text{Tr}(\tilde{K}) \text{Tr}(\tilde{L}) \text{Tr}(\tilde{M})$ . We emphasize that (8) refers to a *null distribution under total independence* - if say, the null holds because  $(X, Y) \perp\!\!\!\perp Z$ , but  $X$  and  $Y$  are dependent, one needs to instead consider a kernel on  $\mathcal{X} \times \mathcal{Y}$  centered at  $P_{XY}$  and the eigenvalues of its integral operator then replace  $\{\lambda_a \eta_b\}$  (triple sum becomes a double sum). This also implies that the bias term needs to be corrected appropriately.

## F Some useful basic matrix algebra

**Lemma 7.** *Let  $A, B$  be  $n \times n$  matrices. The following results hold:*

1.  $\mathbf{1}^\top \mathbf{1} = n$
2.  $[\mathbf{1}\mathbf{1}^\top]_{ij} = 1, \forall i, j$ , and thus  $(\mathbf{1}\mathbf{1}^\top)_{++} = n^2$
3.  $(I - \frac{1}{n}\mathbf{1}\mathbf{1}^\top)^2 = I - \frac{1}{n}\mathbf{1}\mathbf{1}^\top$ .
4.  $[A\mathbf{1}]_i = A_{i+}$ ,  $[\mathbf{1}^\top A]_j = A_{+j}$
5.  $\mathbf{1}^\top A \mathbf{1} = A_{++}$
6.  $(A\mathbf{1}\mathbf{1}^\top)_{++} = (\mathbf{1}\mathbf{1}^\top A)_{++} = nA_{++}$
7.  $(\alpha A + \beta B)_{++} = \alpha A_{++} + \beta B_{++}$
8.  $(A\mathbf{1}\mathbf{1}^\top B)_{++} = A_{++}B_{++}$ .

*Proof.* (3):

$$\left( I - \frac{1}{n}\mathbf{1}\mathbf{1}^\top \right)^2 = I - \frac{2}{n}\mathbf{1}\mathbf{1}^\top + \frac{1}{n^2} \underbrace{\mathbf{1}\mathbf{1}^\top \mathbf{1}\mathbf{1}^\top}_n.$$

(8): From (4),  $[A\mathbf{1}\mathbf{1}^\top B]_{ij} = A_{i+}B_{+j}$ , implying

$$(A\mathbf{1}\mathbf{1}^\top B)_{++} = \sum_{i=1}^n A_{i+} \sum_{j=1}^n B_{+j} = A_{++}B_{++}.$$

□

Now, let  $K$  be a symmetric matrix, and denote  $H = I - \frac{1}{n}\mathbf{1}\mathbf{1}^\top$  (the centering matrix). Then:

$$\begin{aligned} HKH &= \left(I - \frac{1}{n}\mathbf{1}\mathbf{1}^\top\right) K \left(I - \frac{1}{n}\mathbf{1}\mathbf{1}^\top\right) \\ &= K - \frac{1}{n}(K_+ + K_+^\top) + \frac{1}{n^2}K_{++}\mathbf{1}\mathbf{1}^\top. \end{aligned}$$

Note that:

$$\begin{aligned} (HKH)_{++} &= K_{++} - \frac{1}{n}((K_+)_{++} + (K_+^\top)_{++}) + \frac{1}{n^2}K_{++}(\mathbf{1}\mathbf{1}^\top)_{++} \\ &= K_{++} - 2K_{++} + K_{++} = 0. \end{aligned}$$

**Lemma 8.** *The following results hold:*

1.  $A \circ \mathbf{1}\mathbf{1}^\top = \mathbf{1}\mathbf{1}^\top \circ A = A$
2.  $(I \circ A)_{++} = \text{tr}(A)$
3.  $(A \circ B)_{++} = \text{tr}(AB^\top)$
4. For a symmetric matrix  $K$  and any matrix  $A$ ,  $(A \circ K_+)_{++} = (AK)_{++}$ ,  $(A \circ K_+^\top)_{++} = (KA)_{++}$
5. For symmetric matrices  $K, L$ ,  $(K_+ \circ L_+)_{++} = (K_+^\top \circ L_+^\top)_{++} = n(KL)_{++}$
6. For symmetric matrices  $K, L$ ,  $(K_+ \circ L_+^\top)_{++} = (K_+^\top \circ L_+)_{++} = K_{++}L_{++}$ .

*Proof.* (4):  $(A \circ K_+)_{++} = \text{tr}(AK\mathbf{1}\mathbf{1}^\top) = (AK \circ \mathbf{1}\mathbf{1}^\top)_{++} = (AK)_{++}$ . (5):  $(K_+ \circ L_+)_{++} = (K_+L)_{++} = (\mathbf{1}\mathbf{1}^\top KL)_{++} = n(KL)_{++}$ .  $\square$

**Proposition 9.** *Denote  $H = I - \frac{1}{n}\mathbf{1}\mathbf{1}^\top$ . Then:*

$$(K \circ H L H)_{++} = (K \circ L)_{++} - \frac{2}{n}(KL)_{++} + \frac{1}{n^2}K_{++}L_{++}.$$

*Proof.* Let  $K$  and  $L$  be symmetric matrices and consider  $K \circ H L H$ . We obtain:

$$\begin{aligned} K \circ H L H &= K \circ \left(L - \frac{1}{n}(L_+ + L_+^\top) + \frac{1}{n^2}L_{++}\mathbf{1}\mathbf{1}^\top\right) \\ &= K \circ L - \frac{1}{n}(K \circ L_+ + K \circ L_+^\top) + \frac{1}{n^2}L_{++}K, \end{aligned}$$

so that:

$$(K \circ H L H)_{++} = (K \circ L)_{++} - \frac{2}{n}(KL)_{++} + \frac{1}{n^2}K_{++}L_{++}.$$

$\square$

**Corollary 10.**  $\text{tr}(H L H) = \text{tr}(L) - \frac{1}{n}L_{++}$
